# Supplementary material for: Protein Lactylation Critically Regulates Energy Metabolism in the Protozoan Parasite Trypanosoma brucei
Source: Front Cell Dev Biol. 2021 Oct 14;9:719720. doi: 10.3389/fcell.2021.719720 (PMC8551762; doi:10.3389/fcell.2021.719720)
Supplement: Supplementary file 2 [file Data_Sheet_2.ZIP]

Archive with 19 entries (18 files):
- Supplementary FIgures/
- Supplementary FIgures/Supplementary Figure 8.tif
- __MACOSX/Supplementary FIgures/._Supplementary Figure 8.tif
- Supplementary FIgures/.DS_Store
- __MACOSX/Supplementary FIgures/._.DS_Store
- Supplementary FIgures/Supplementary Figure 1.tif
- __MACOSX/Supplementary FIgures/._Supplementary Figure 1.tif
- Supplementary FIgures/Supplementary Figure 2.tif
- __MACOSX/Supplementary FIgures/._Supplementary Figure 2.tif
- Supplementary FIgures/Supplementary Figure 3.tif
- __MACOSX/Supplementary FIgures/._Supplementary Figure 3.tif
- Supplementary FIgures/Supplementary Figure 7.tif
- __MACOSX/Supplementary FIgures/._Supplementary Figure 7.tif
- Supplementary FIgures/Supplementary Figure 6.tif
- __MACOSX/Supplementary FIgures/._Supplementary Figure 6.tif
- Supplementary FIgures/Supplementary Figure 4.tif
- __MACOSX/Supplementary FIgures/._Supplementary Figure 4.tif
- Supplementary FIgures/Supplementary Figure 5.tif
- __MACOSX/Supplementary FIgures/._Supplementary Figure 5.tif
